# Supplementary material for: A spectroscopic andab initiostudy of the hydrogen peroxide–formic acid complex: hindering the internal motion of H2O2
Source: Royal Society of Chemistry journal article supplement (doi:10.1039/c8cp03342k), 2018-01-01
Supplement: c8cp03342k1.pdf [file c8cp03342k1.pdf]

## Supporting Information for

### A Spectroscopic and *ab initio* Study of the Hydrogen Peroxide–Formic Acid Complex: Hindering of a Large Amplitude Motion

Leo Yuxiu Li, Nathan A. Seifert, Fan Xie, Matthias Heger, Yunjie Xu, and Wolfgang Jäger\*

Department of Chemistry, University of Alberta, Edmonton, Alberta T6G 2G2, Canada

E-mail: [wolfgang.jaeger@ualberta.ca](mailto:wolfgang.jaeger@ualberta.ca)

---

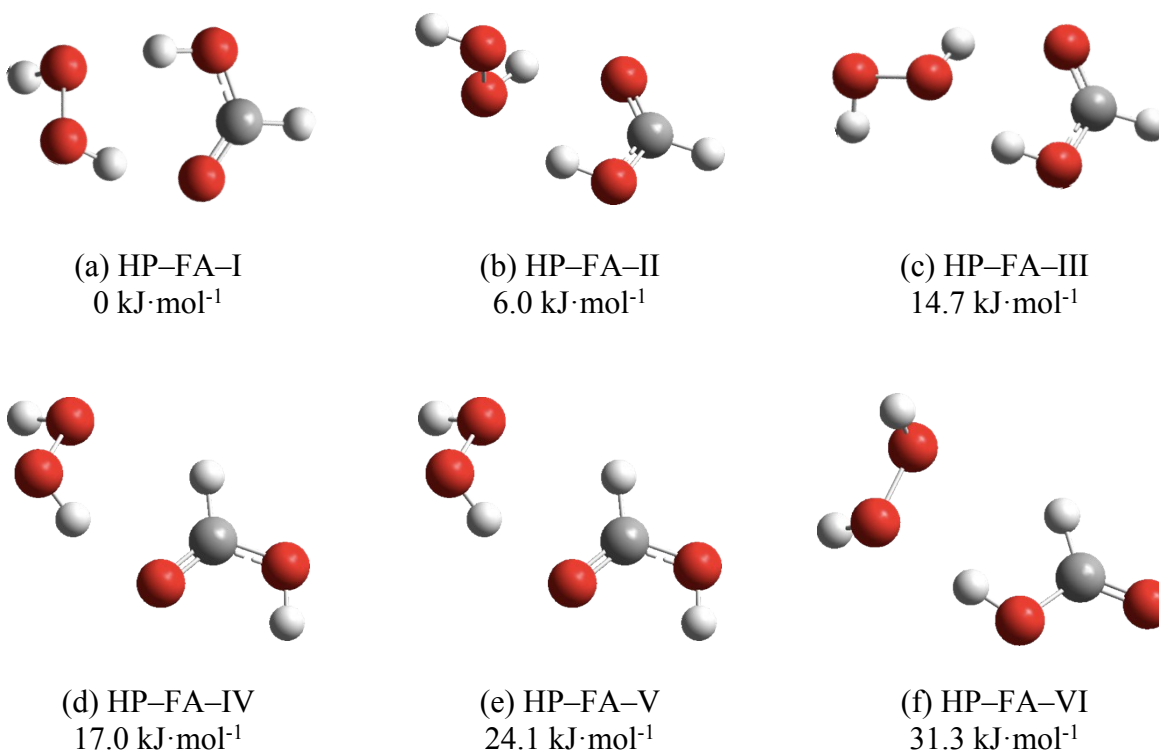

**Fig. S1** Six optimized structures of the HP-FA complex and their relative energies. All structures and energies were calculated at the MP2/6-311++G(2d,p) level of theory.

Table S2 Experimental intrastate (*a*-/*b*-type) transition frequencies (in MHz) and quantum number assignments

| $J'(K_a', K_c') \leftarrow J''(K_a'', K_c'')$ | $0^+$     | $0^-$     |
|-----------------------------------------------|-----------|-----------|
| 1(0,1) – 0(0,0)                               | 5106.851  | 5107.584  |
| 1(1,1) – 0(0,0)                               | 10457.728 | 10457.831 |
| 1(1,0) – 1(0,1)                               | 6075.883  | 6075.166  |
| 2(0,2) – 1(0,1)                               | 10144.812 | 10147.023 |
| 2(1,1) – 1(1,0)                               | 10937.631 | 10939.417 |
| 2(1,2) – 1(0,1)                               | 14839.246 | 14839.902 |
| 2(0,2) – 1(1,1)                               | 4793.935  | 4796.776  |
| 2(1,2) – 1(1,1)                               | 9488.369  | 9489.655  |
| 2(1,1) – 2(0,2)                               | 6868.702  | 6867.560  |
| 3(0,3) – 2(0,2)                               | 15049.022 | 15044.800 |
| 3(1,2) – 2(1,1)                               | 16368.463 | 16363.714 |
| 3(0,3) – 2(1,2)                               | 10354.588 | 10351.921 |
| 3(1,3) – 2(1,2)                               |           | 14193.477 |
| 3(1,2) – 3(0,3)                               | 8188.143  | 8186.474  |

Table S3 Experimental interstate (*c*-type) transition frequencies (in MHz)

| $J'(K_a', K_c') \leftarrow J''(K_a'', K_c'')$ | $0^+ \leftarrow 0^-$ | $0^- \leftarrow 0^+$ |
|-----------------------------------------------|----------------------|----------------------|
| 1(1,1) – 1(0,1)                               | 13019.529            |                      |
| 2(1,1) – 1(0,1)                               |                      | 9344.232             |
| 2(0,2) – 1(1,0)                               | 11740.422            |                      |
| 2(1,2) – 2(0,2)                               | 12364.372            |                      |
| 3(1,2) – 2(0,2)                               |                      | 15565.672            |
| 3(0,3) – 2(1,1)                               | 15847.591            |                      |
| 3(1,3) – 3(0,3)                               | 11508.827            |                      |
